# Supplementary material for: Efficacy of granulocyte colony stimulating factor in patients with severe alcoholic hepatitis with partial or null response to steroid (GRACIAH trial): study protocol for a randomized controlled trial
Source: Springer Nature journal article supplement (doi:10.1186/s13063-018-3092-7), 2018-12-01
Supplement: MOESM2 [file 16358124]

Screening Study Participants No. \_\_ S \_ \_ \_

Initial of Name:

Date of birth: YYYY-MM-DD

Date of admission (the 1<sup>st</sup> date to ER or ward) : YYYY-MM-DD

Age:    years

Sex:  Male  Female

Bwt:     Kg

Ht:      cm

BMI:



|  |  |                                                          |                                                          |
|--|--|----------------------------------------------------------|----------------------------------------------------------|
|  |  | <input type="checkbox"/> Yes <input type="checkbox"/> No | <input type="checkbox"/> Yes <input type="checkbox"/> No |
|  |  | <input type="checkbox"/> Yes <input type="checkbox"/> No | <input type="checkbox"/> Yes <input type="checkbox"/> No |
|  |  | <input type="checkbox"/> Yes <input type="checkbox"/> No | <input type="checkbox"/> Yes <input type="checkbox"/> No |

Concomitant medication (which is used after the consent to clinical trial)

: Only the drugs of clinical significance are recorded by the clinician. (Ex. Fluid therapy is excluded)

None

| Medication | Dose | Start Date | On-going | End Date |
|------------|------|------------|----------|----------|
|            |      |            |          |          |
|            |      |            |          |          |
|            |      |            |          |          |
|            |      |            |          |          |
|            |      |            |          |          |
|            |      |            |          |          |
|            |      |            |          |          |
|            |      |            |          |          |
|            |      |            |          |          |

Dopamine (dose\_  $\mu\text{g}/\text{min}$  ), Start Date YYYY-MM-DD, End Date YYYY-MM-DD

Dobutamine (dose\_  $\mu\text{g}/\text{min}$  ), Start Date YYYY-MM-DD, End Date YYYY-MM-DD

Terlipressin (dose\_  $\text{mg}$ ), Start Date YYYY-MM-DD, End Date YYYY-MM-DD

Epinephrine (dose\_  $\mu\text{g}/\text{min}$  ), Start Date YYYY-MM-DD, End Date YYYY-MM-DD

Norepinephrine (dose\_  $\mu\text{g}/\text{min}$ ), Start Date YYYY-MM-DD, End Date YYYY-MM-DD

Antibiotics Yes (Drug Name:           ), Start Date YYYY-MM-DD, End Date YYYY-MM-DD

No

Date of test (YYYY-MM-DD):

Complete blood count (CBC)

| Item                                  | Result | If abnormal, CS NCS judgment                             |
|---------------------------------------|--------|----------------------------------------------------------|
| WBC( $\times 10^3/\mu\text{L}$ )      |        | <input type="checkbox"/> CS <input type="checkbox"/> NCS |
| Neutrophil (%)                        |        | <input type="checkbox"/> CS <input type="checkbox"/> NCS |
| Lymphocyte (%)                        |        | <input type="checkbox"/> CS <input type="checkbox"/> NCS |
| Monocyte (%)                          |        | <input type="checkbox"/> CS <input type="checkbox"/> NCS |
| Hemoglobin(g/dL)                      |        | <input type="checkbox"/> CS <input type="checkbox"/> NCS |
| Platelet( $\times 10^3/\mu\text{L}$ ) |        | <input type="checkbox"/> CS <input type="checkbox"/> NCS |

Routine Chemistry

| Item                   | Result | If abnormal, CS NCS judgment                             |
|------------------------|--------|----------------------------------------------------------|
| Inorganic P(mg/dl)     |        | <input type="checkbox"/> CS <input type="checkbox"/> NCS |
| Glucose(mg/dl)         |        | <input type="checkbox"/> CS <input type="checkbox"/> NCS |
| BUN(mg/dl)             |        | <input type="checkbox"/> CS <input type="checkbox"/> NCS |
| Creatinine(mg/dl)      |        | <input type="checkbox"/> CS <input type="checkbox"/> NCS |
| GFR (mL/min)           |        | <input type="checkbox"/> CS <input type="checkbox"/> NCS |
| Uric acid(mg/dl)       |        | <input type="checkbox"/> CS <input type="checkbox"/> NCS |
| Cholesterol(mg/dl)     |        | <input type="checkbox"/> CS <input type="checkbox"/> NCS |
| Calcium(mg/dl)         |        | <input type="checkbox"/> CS <input type="checkbox"/> NCS |
| Total Protein(g/dl)    |        | <input type="checkbox"/> CS <input type="checkbox"/> NCS |
| Albumin(g/dl)          |        | <input type="checkbox"/> CS <input type="checkbox"/> NCS |
| Total bilirubin(mg/dl) |        | <input type="checkbox"/> CS <input type="checkbox"/> NCS |

|                       |  |                             |                              |
|-----------------------|--|-----------------------------|------------------------------|
| Alk.Phosphatase(IU/L) |  | <input type="checkbox"/> CS | <input type="checkbox"/> NCS |
| AST(SGOT)(IU/L)       |  | <input type="checkbox"/> CS | <input type="checkbox"/> NCS |
| ALT(SGPT)(IU/L)       |  | <input type="checkbox"/> CS | <input type="checkbox"/> NCS |
| GGT (IU/L)            |  | <input type="checkbox"/> CS | <input type="checkbox"/> NCS |
| Na (mmol/L)           |  | <input type="checkbox"/> CS | <input type="checkbox"/> NCS |
| K(mmol/L)             |  | <input type="checkbox"/> CS | <input type="checkbox"/> NCS |
| CRP(mg/dl)            |  | <input type="checkbox"/> CS | <input type="checkbox"/> NCS |

Coagulation test

| Item     | Result | If abnormal, CS NCS judgment |                              |
|----------|--------|------------------------------|------------------------------|
| PT(Sec)  | Sec    | <input type="checkbox"/> CS  | <input type="checkbox"/> NCS |
| PT (%)   | %      | <input type="checkbox"/> CS  | <input type="checkbox"/> NCS |
| PT (INR) |        | <input type="checkbox"/> CS  | <input type="checkbox"/> NCS |

Urinalysis, ascites, culture study, stool lab

| Specimen                     | Item                       | Result | If abnormal, CS NCS judgment |                              |
|------------------------------|----------------------------|--------|------------------------------|------------------------------|
| Urinalysis                   | WBC(/HPF)                  |        | <input type="checkbox"/> CS  | <input type="checkbox"/> NCS |
|                              | RBC(/HPF)                  |        | <input type="checkbox"/> CS  | <input type="checkbox"/> NCS |
|                              | cast                       |        | <input type="checkbox"/> CS  | <input type="checkbox"/> NCS |
|                              | bacteria                   |        | <input type="checkbox"/> CS  | <input type="checkbox"/> NCS |
|                              | bilirubin                  |        | <input type="checkbox"/> CS  | <input type="checkbox"/> NCS |
|                              | nitrite                    |        | <input type="checkbox"/> CS  | <input type="checkbox"/> NCS |
|                              | Na/K/Cl(mmol/L)            |        | <input type="checkbox"/> CS  | <input type="checkbox"/> NCS |
| Ascites                      | WBC(absolute count)        |        | <input type="checkbox"/> CS  | <input type="checkbox"/> NCS |
| <input type="checkbox"/> Not | Neutrophil(absolute count) |        | <input type="checkbox"/> CS  | <input type="checkbox"/> NCS |

|                                       |                            |                                                                                                                                  |                                                          |
|---------------------------------------|----------------------------|----------------------------------------------------------------------------------------------------------------------------------|----------------------------------------------------------|
| done<br><input type="checkbox"/> Done | Lymphocyte(absolute count) |                                                                                                                                  | <input type="checkbox"/> CS <input type="checkbox"/> NCS |
|                                       | Monocyte(absolute count)   |                                                                                                                                  | <input type="checkbox"/> CS <input type="checkbox"/> NCS |
|                                       | RBC(absolute count)        |                                                                                                                                  | <input type="checkbox"/> CS <input type="checkbox"/> NCS |
|                                       | Protein(mg/dl)             |                                                                                                                                  | <input type="checkbox"/> CS <input type="checkbox"/> NCS |
|                                       | Glucose(mg/dl)             |                                                                                                                                  | <input type="checkbox"/> CS <input type="checkbox"/> NCS |
|                                       | Amylase(U/L)               |                                                                                                                                  | <input type="checkbox"/> CS <input type="checkbox"/> NCS |
|                                       | Albumin(g/dl)              |                                                                                                                                  | <input type="checkbox"/> CS <input type="checkbox"/> NCS |
| Culture study                         | Blood                      | <input type="checkbox"/> Not done<br><input type="checkbox"/> Positive (Name of bacteria: )<br><input type="checkbox"/> Negative | <input type="checkbox"/> CS <input type="checkbox"/> NCS |
|                                       | Ascites                    | <input type="checkbox"/> Not done<br><input type="checkbox"/> Positive (Name of bacteria: )<br><input type="checkbox"/> Negative | <input type="checkbox"/> CS <input type="checkbox"/> NCS |
|                                       | Urine                      | <input type="checkbox"/> Not done<br><input type="checkbox"/> Positive (Name of bacteria: )<br><input type="checkbox"/> Negative | <input type="checkbox"/> CS <input type="checkbox"/> NCS |
|                                       | Stool                      | <input type="checkbox"/> Not done<br><input type="checkbox"/> Positive (Name of bacteria: )<br><input type="checkbox"/> Negative | <input type="checkbox"/> CS <input type="checkbox"/> NCS |
| Stool                                 | parasite                   | <input type="checkbox"/> Not done                                                                                                | <input type="checkbox"/> CS <input type="checkbox"/> NCS |

|  |              |                                          |                                                          |
|--|--------------|------------------------------------------|----------------------------------------------------------|
|  |              | ( )                                      |                                                          |
|  | ova          | <input type="checkbox"/> Not done<br>( ) | <input type="checkbox"/> CS <input type="checkbox"/> NCS |
|  | occult blood | <input type="checkbox"/> Not done<br>( ) | <input type="checkbox"/> CS <input type="checkbox"/> NCS |

Samples for research

- Blood    Urine    Ascites    Stool    Liver tissue    No

Clinical evaluation

| Item                                                                      | Result                                                                                                                                          | If abnormal, CS NCS judgment |
|---------------------------------------------------------------------------|-------------------------------------------------------------------------------------------------------------------------------------------------|------------------------------|
| Systolic BP (mmHg)                                                        |                                                                                                                                                 |                              |
| Diastolic BP (mmHg)                                                       |                                                                                                                                                 |                              |
| Pulse rate (bpm)                                                          |                                                                                                                                                 |                              |
| PaO <sub>2</sub><br><input type="checkbox"/> Y <input type="checkbox"/> N | ( ) mmHg                                                                                                                                        |                              |
| SpO <sub>2</sub><br><input type="checkbox"/> Y <input type="checkbox"/> N | ( ) %                                                                                                                                           |                              |
| O <sub>2</sub> supply                                                     | <input type="checkbox"/> No <input type="checkbox"/> Yes ( ) L/min<br><input type="checkbox"/> facial mask <input type="checkbox"/> nasal prong |                              |
| Mechanical ventilation                                                    | <input type="checkbox"/> Yes (FiO <sub>2</sub> : ) <input type="checkbox"/> No                                                                  |                              |
| Respiratory rate (/min)                                                   |                                                                                                                                                 |                              |
| Body temperature (°C)                                                     |                                                                                                                                                 |                              |
| Infection at admission                                                    | <input type="checkbox"/> Spontaneous bacteremia                                                                                                 |                              |

|                                                                                                |                                                                                                                                                                                                                                                                                                                                                                                                                           |                                                                                                                                     |
|------------------------------------------------------------------------------------------------|---------------------------------------------------------------------------------------------------------------------------------------------------------------------------------------------------------------------------------------------------------------------------------------------------------------------------------------------------------------------------------------------------------------------------|-------------------------------------------------------------------------------------------------------------------------------------|
|                                                                                                | <input type="checkbox"/> SBP<br><input type="checkbox"/> Lower respiratory tract infection<br><input type="checkbox"/> C. difficile<br><input type="checkbox"/> bacterial enterocolitis<br><input type="checkbox"/> skin infection<br><input type="checkbox"/> UTI<br><input type="checkbox"/> intraabdominal infection<br><input type="checkbox"/> secondary bacterial peritonitis                                       |                                                                                                                                     |
| Gastrointestinal hemorrhage<br><input type="checkbox"/> Not done <input type="checkbox"/> Done | <input type="checkbox"/> No <input type="checkbox"/> Yes( <input type="checkbox"/> Esophageal varix<br><input type="checkbox"/> Gastric varix<br><input type="checkbox"/> Portal hypertensive gastropathy<br><input type="checkbox"/> Gastric ulcer<br><input type="checkbox"/> Duodenal ulcer<br><input type="checkbox"/> Mallory-Weiss<br><input type="checkbox"/> Angiodysplasia<br><input type="checkbox"/> etc(____) |                                                                                                                                     |
| Encephalopathy                                                                                 | <input type="checkbox"/> No <input type="checkbox"/> Yes (grade__ [1-4])                                                                                                                                                                                                                                                                                                                                                  | 1) Grade 0: Subclinical<br>2) Grade 1: depression, mania, sleep disturbance<br>3) Grade 2: somnolence, personality change, flapping |

|                                      |                                                                 |                                                                                      |
|--------------------------------------|-----------------------------------------------------------------|--------------------------------------------------------------------------------------|
|                                      |                                                                 | tremor<br>4) Grade 3: Most of the time sleep but you can wake up<br>5) Grade 4: coma |
| Dialysis / renal replacement therapy | <input type="checkbox"/> Not done <input type="checkbox"/> Done |                                                                                      |

Other blood test :  Yes  No

Date of test: (YYYY-MM-DD) :

Image, tissue, other blood test

| Item                                                                                              | Result                                                                                                                                                                                                                                                                                             | If abnormal, check CS NCS                                |
|---------------------------------------------------------------------------------------------------|----------------------------------------------------------------------------------------------------------------------------------------------------------------------------------------------------------------------------------------------------------------------------------------------------|----------------------------------------------------------|
| HBsAg                                                                                             | <input type="checkbox"/> negative <input type="checkbox"/> positive                                                                                                                                                                                                                                | <input type="checkbox"/> CS <input type="checkbox"/> NCS |
| Anti-HCV                                                                                          | <input type="checkbox"/> negative <input type="checkbox"/> positive                                                                                                                                                                                                                                | <input type="checkbox"/> CS <input type="checkbox"/> NCS |
| Anti-HIV                                                                                          | <input type="checkbox"/> negative <input type="checkbox"/> positive                                                                                                                                                                                                                                | <input type="checkbox"/> CS <input type="checkbox"/> NCS |
| Chest PA<br><input type="checkbox"/> Y <input type="checkbox"/> N<br>(YYYY-MM-DD)                 | <input type="checkbox"/> Normal <input type="checkbox"/> Abnormal<br>(impression:____)                                                                                                                                                                                                             | <input type="checkbox"/> CS <input type="checkbox"/> NCS |
| Abdomen USG or CT or MRI<br><input type="checkbox"/> Y <input type="checkbox"/> N<br>(YYYY-MM-DD) | <input type="checkbox"/> Normal<br><input type="checkbox"/> Abnormal (impression:____)<br>Ascites <input type="checkbox"/> Yes <input type="checkbox"/> No                                                                                                                                         |                                                          |
| Endoscopy<br><input type="checkbox"/> Y <input type="checkbox"/> N<br>(YYYY-MM-DD)                | <input type="checkbox"/> Normal <input type="checkbox"/> Abnormal<br><input type="checkbox"/> Esophageal varix: F1/2/3, RCS(+/-)<br><input type="checkbox"/> Gastric varix: F1/2/3, RCS(+/-)<br><input type="checkbox"/> Portal hypertensive gastropathy<br><input type="checkbox"/> Gastric ulcer |                                                          |

|                                                                                                                                               |                                                                                                                                                                   |                                                          |
|-----------------------------------------------------------------------------------------------------------------------------------------------|-------------------------------------------------------------------------------------------------------------------------------------------------------------------|----------------------------------------------------------|
|                                                                                                                                               | <input type="checkbox"/> Duodenal ulcer<br><input type="checkbox"/> Mallory-Weiss<br><input type="checkbox"/> Angiodysplasia<br><input type="checkbox"/> etc_____ |                                                          |
| AFP<br><input type="checkbox"/> Y <input type="checkbox"/> N<br>(YYYY-MM-DD)                                                                  | <input type="checkbox"/> IU/ml<br><input type="checkbox"/> ng/ml                                                                                                  | <input type="checkbox"/> CS <input type="checkbox"/> NCS |
| Procalcitonin (ng/ml)<br><input type="checkbox"/> Y <input type="checkbox"/> N<br>(YYYY-MM-DD)                                                |                                                                                                                                                                   |                                                          |
| HVPG<br><input type="checkbox"/> Y <input type="checkbox"/> N<br>(YYYY-MM-DD)                                                                 | ( )mmHg                                                                                                                                                           |                                                          |
| Histologic scoring or liver<br>(transjugular or percutaneous biopsy)<br><input type="checkbox"/> Y <input type="checkbox"/> N<br>(YYYY-MM-DD) | hepatocellular damage/ballooning<br>(0=mild; 1=marked)                                                                                                            |                                                          |
|                                                                                                                                               | Mallory bodies (0=absent; 1=present)                                                                                                                              |                                                          |
|                                                                                                                                               | Polymorphonuclear (PMN) infiltration<br>(0=mild; 1=moderate/severe)                                                                                               |                                                          |
|                                                                                                                                               | Steatosis (0, <33%; 1, 33 - 66%; 2, >66%)                                                                                                                         |                                                          |
|                                                                                                                                               | Lobular fibrosis (0=no fibrosis or zone 3; 1=fibrosis in zone 2+3; 2=panlobular fibrosis),                                                                        |                                                          |
|                                                                                                                                               | Fibrosis stage (0=no fibrosis or portal fibrosis; 1= expansive periportal fibrosis; 2= bridging fibrosis and                                                      |                                                          |

|  |                                                                                                                                                                                      |  |
|--|--------------------------------------------------------------------------------------------------------------------------------------------------------------------------------------|--|
|  | cirrhosis)                                                                                                                                                                           |  |
|  | Megamitochondria (0=no; 1=yes)                                                                                                                                                       |  |
|  | Bilirubinostasis (0=none;<br>1=hepatocellular bilirubinostasis;<br>2=canalicular or ductular<br>bilirubinostasis; 3=hepatocellular +<br>canalicular or ductular<br>bilirubinostasis) |  |

### Eligibility Evaluation

| Criteria of Inclusion                                                                                                                                                                                                                                                                                                 | Yes                      | No                       |
|-----------------------------------------------------------------------------------------------------------------------------------------------------------------------------------------------------------------------------------------------------------------------------------------------------------------------|--------------------------|--------------------------|
| 1. Age > 20 years, < 80 years                                                                                                                                                                                                                                                                                         | <input type="checkbox"/> | <input type="checkbox"/> |
| 2. History of clinically significant amount of alcohol intake ( $\geq 50$ g daily for men, and $\geq 40$ g daily for women over the last 2 months)                                                                                                                                                                    | <input type="checkbox"/> | <input type="checkbox"/> |
| 3. MDF during the screening period = $[4.6 \times (\text{patient's prothrombin time, sec} - \text{control prothrombin time, sec})] + \text{serum bilirubin level (mg/dL)} \geq 32$                                                                                                                                    | <input type="checkbox"/> | <input type="checkbox"/> |
| 4. Newly occurred jaundice within the last 3 months when a liver biopsy could not be performed, (total serum bilirubin level $> 5$ mg/dL), or pathological findings of transjugular liver tissue biopsy consistent with alcoholic hepatitis (hepatocellular ballooning and polymorphonuclear leukocytic infiltration) | <input type="checkbox"/> | <input type="checkbox"/> |

|                                                                                                                                                                                                                       |                          |                          |
|-----------------------------------------------------------------------------------------------------------------------------------------------------------------------------------------------------------------------|--------------------------|--------------------------|
| 5. After satisfying criteria nos. 1–4, Lille score >0.16 on day 7 after daily administration of 40 mg prednisolone (or intravenous methylprednisolone of the equivalent efficacy dose in case of oral intolerability) | <input type="checkbox"/> | <input type="checkbox"/> |
| ▶ If any of the above criteria falls into 'No', you will not be able to participate in random assignments.                                                                                                            |                          |                          |

| Criteria of Exclusion                                                                                                                                                                                                                               | Yes                      | No                       |
|-----------------------------------------------------------------------------------------------------------------------------------------------------------------------------------------------------------------------------------------------------|--------------------------|--------------------------|
| 1. Positive for the hepatitis B surface antigen, anti-hepatitis C antibody, or anti-human immunodeficiency virus antibody                                                                                                                           | <input type="checkbox"/> | <input type="checkbox"/> |
| 2. Malignant neoplasm including hepatocellular carcinoma                                                                                                                                                                                            | <input type="checkbox"/> | <input type="checkbox"/> |
| 3. Portal vein thrombosis, hemochromatosis, autoimmune hepatitis, Wilson's disease, or alpha-1-antitrypsin deficiency                                                                                                                               | <input type="checkbox"/> | <input type="checkbox"/> |
| 4. Pregnant or breastfeeding women or those who refuse to use or cannot use contraceptives                                                                                                                                                          | <input type="checkbox"/> | <input type="checkbox"/> |
| 5. History of hypersensitivity to G-CSF injection                                                                                                                                                                                                   | <input type="checkbox"/> | <input type="checkbox"/> |
| 6. Hypovolemic shock due to gastrointestinal bleeding at the time of hospitalization, or in need of a transfusion of more than 3 units of packed red blood cells, or MDF is elevated from <32 points to ≥32 points due to gastrointestinal bleeding | <input type="checkbox"/> | <input type="checkbox"/> |
| 7. Sepsis or uncontrolled acute infection                                                                                                                                                                                                           | <input type="checkbox"/> | <input type="checkbox"/> |
| 8. Hepatic encephalopathy grade 3–4                                                                                                                                                                                                                 | <input type="checkbox"/> | <input type="checkbox"/> |
| 9. Patients with a previous treatment history of corticosteroids or pentoxifylline within the past 3 months                                                                                                                                         | <input type="checkbox"/> | <input type="checkbox"/> |
| 10. Myeloblasts observed in peripheral blood                                                                                                                                                                                                        | <input type="checkbox"/> | <input type="checkbox"/> |
| 11. Severe comorbidities (type 1 hepatorenal syndrome or serum creatinine                                                                                                                                                                           | <input type="checkbox"/> | <input type="checkbox"/> |

|                                                                                                                                     |  |                          |                          |
|-------------------------------------------------------------------------------------------------------------------------------------|--|--------------------------|--------------------------|
| >2.5 mg/dL at the time of screening, heart failure, lung disease, mental illness, and acute pancreatitis)                           |  |                          |                          |
| 12. Refusal to participate in the clinical trial                                                                                    |  | <input type="checkbox"/> | <input type="checkbox"/> |
| ▶ If any of the above criteria falls into 'Yes', you will not be able to participate in random assignments.                         |  |                          |                          |
| <b>Assessment of suitability of subjects</b>                                                                                        |  |                          |                          |
| Is this study participant trial eligible for this clinical? <input type="checkbox"/> Yes <input type="checkbox"/> No →Reason: _____ |  |                          |                          |
| <b>Signature / Date</b>                                                                                                             |  |                          |                          |
| <b>Writer</b>                                                                                                                       |  | <b>Checker</b>           |                          |

**Screening failure**

|                                                         |                                                                                                                                                                                                                                   |
|---------------------------------------------------------|-----------------------------------------------------------------------------------------------------------------------------------------------------------------------------------------------------------------------------------|
| <b>Date of screening failure (before randomization)</b> | (YYYY-MM-DD)                                                                                                                                                                                                                      |
| <b>Reason</b><br>→ check one point                      | <input type="checkbox"/> Ineligibility for inclusion/exclusion criteria<br><input type="checkbox"/> Liver transplantation<br><input type="checkbox"/> Adverse event<br><input type="checkbox"/> Non-fulfilment for the trial plan |

|                         |                                                                                                                                                        |                |  |   |
|-------------------------|--------------------------------------------------------------------------------------------------------------------------------------------------------|----------------|--|---|
|                         | <input type="checkbox"/> Request for the study participants<br><input type="checkbox"/> Follow-up loss<br><input type="checkbox"/> etc → reason: _____ |                |  |   |
| <b>Signature / Date</b> |                                                                                                                                                        |                |  | / |
| <b>Writer</b>           |                                                                                                                                                        | <b>Checker</b> |  |   |

**Drug**

|                                                                                                 |                                                                        |
|-------------------------------------------------------------------------------------------------|------------------------------------------------------------------------|
| Steroid<br><input type="checkbox"/> Prednisolone<br><input type="checkbox"/> methylprednisolone | Start date (YYYY-MM-DD) ,<br>Dose (      mg )<br>End date (YYYY-MM-DD) |
| Pentoxifylline<br><input type="checkbox"/> Yes <input type="checkbox"/> No                      | Start date (YYYY-MM-DD) ,<br>Dose (      mg )<br>End date (YYYY-MM-DD) |
| N-acetylcysteine<br><input type="checkbox"/> Yes <input type="checkbox"/> No                    | Start date (YYYY-MM-DD) ,<br>Dose (      mg )<br>End date (YYYY-MM-DD) |

**Partial responder or Null responder**

**G-CSF or placebo injection** (      ) ug/kg (Date of Injection: day 8-12, 15, 18, 21, 24, 27, 30, and 33).

1st Dose : (YYYY-MM-DD)

2<sup>nd</sup> Dose : (YYYY-MM-DD)

3<sup>rd</sup> Dose : (YYYY-MM-DD)

4<sup>th</sup> Dose : (YYYY-MM-DD)

5<sup>th</sup> Dose : (YYYY-MM-DD)

6<sup>th</sup> Dose : (YYYY-MM-DD)

7<sup>th</sup> Dose : (YYYY-MM-DD)

8<sup>th</sup> Dose : (YYYY-MM-DD)

9<sup>th</sup> Dose : (YYYY-MM-DD)

10<sup>th</sup> Dose : (YYYY-MM-DD)

11<sup>th</sup> Dose : (YYYY-MM-DD)

12<sup>th</sup> Dose : (YYYY-MM-DD)**Randomization**

| Lille category     | Treatment arms                    |             |
|--------------------|-----------------------------------|-------------|
| Complete responder | Not applicable (continue steroid) | <del></del> |
| Partial responder  | steroid+placebo vs. steroid+G-CSF |             |
| Null responder     | placebo vs. G-CSF                 |             |

At admission day (admission lab), if  $MDF \geq 32$  regardless of biopsy or not, day of starting steroid treatment is defined as day 0.

At admission day, if  $MDF < 32 \rightarrow$  Day at  $MDF \geq 32$  is the baseline (Day 0), / if liver biopsy is performed, day at  $MDF \geq 32$  is the baseline and day of starting steroid treatment is day 0.

**Day 1 (Day of starting steroid treatment or most recent date just before steroid use)**

Date of test: (YYYY-MM-DD)

## Complete blood count

| Item                                  | Result | If abnormal, check CS NCS                                |
|---------------------------------------|--------|----------------------------------------------------------|
| WBC( $\times 10^3/\mu\text{L}$ )      |        | <input type="checkbox"/> CS <input type="checkbox"/> NCS |
| Neutrophil (%)                        |        | <input type="checkbox"/> CS <input type="checkbox"/> NCS |
| Lymphocyte (%)                        |        | <input type="checkbox"/> CS <input type="checkbox"/> NCS |
| Monocyte (%)                          |        | <input type="checkbox"/> CS <input type="checkbox"/> NCS |
| Hemoglobin(g/dL)                      |        | <input type="checkbox"/> CS <input type="checkbox"/> NCS |
| Platelet( $\times 10^3/\mu\text{L}$ ) |        | <input type="checkbox"/> CS <input type="checkbox"/> NCS |

## Routine Chemistry

| Item                   | Result | If abnormal, check CS NCS                                |
|------------------------|--------|----------------------------------------------------------|
| Inorganic P(mg/dl)     |        | <input type="checkbox"/> CS <input type="checkbox"/> NCS |
| Glucose(mg/dl)         |        | <input type="checkbox"/> CS <input type="checkbox"/> NCS |
| BUN(mg/dl)             |        | <input type="checkbox"/> CS <input type="checkbox"/> NCS |
| Creatinine(mg/dl)      |        | <input type="checkbox"/> CS <input type="checkbox"/> NCS |
| GFR (mL/min)           |        | <input type="checkbox"/> CS <input type="checkbox"/> NCS |
| Uric acid(mg/dl)       |        | <input type="checkbox"/> CS <input type="checkbox"/> NCS |
| Cholesterol(mg/dl)     |        | <input type="checkbox"/> CS <input type="checkbox"/> NCS |
| Calcium(mg/dl)         |        | <input type="checkbox"/> CS <input type="checkbox"/> NCS |
| Total Protein(g/dl)    |        | <input type="checkbox"/> CS <input type="checkbox"/> NCS |
| Albumin(g/dl)          |        | <input type="checkbox"/> CS <input type="checkbox"/> NCS |
| Total bilirubin(mg/dl) |        | <input type="checkbox"/> CS <input type="checkbox"/> NCS |

|                       |  |                             |                              |
|-----------------------|--|-----------------------------|------------------------------|
| Alk.Phosphatase(IU/L) |  | <input type="checkbox"/> CS | <input type="checkbox"/> NCS |
| AST(SGOT)(IU/L)       |  | <input type="checkbox"/> CS | <input type="checkbox"/> NCS |
| ALT(SGPT)(IU/L)       |  | <input type="checkbox"/> CS | <input type="checkbox"/> NCS |
| GGT (IU/L)            |  | <input type="checkbox"/> CS | <input type="checkbox"/> NCS |
| Na (mmol/L)           |  | <input type="checkbox"/> CS | <input type="checkbox"/> NCS |
| K (mmol/L)            |  | <input type="checkbox"/> CS | <input type="checkbox"/> NCS |

## Coagulation test

| item     | Result | If abnormal, check CS NCS   |                              |
|----------|--------|-----------------------------|------------------------------|
| PT(Sec)  |        | <input type="checkbox"/> CS | <input type="checkbox"/> NCS |
| PT (%)   |        | <input type="checkbox"/> CS | <input type="checkbox"/> NCS |
| PT (INR) |        | <input type="checkbox"/> CS | <input type="checkbox"/> NCS |

**Day 3**

Date of test: (YYYY-MM-DD)

Complete blood count

| Item                                  | Result | If abnormal, check CS NCS                                |
|---------------------------------------|--------|----------------------------------------------------------|
| WBC( $\times 10^3/\mu\text{L}$ )      |        | <input type="checkbox"/> CS <input type="checkbox"/> NCS |
| Neutrophil (%)                        |        | <input type="checkbox"/> CS <input type="checkbox"/> NCS |
| Lymphocyte (%)                        |        | <input type="checkbox"/> CS <input type="checkbox"/> NCS |
| Monocyte (%)                          |        | <input type="checkbox"/> CS <input type="checkbox"/> NCS |
| Hemoglobin(g/dL)                      |        | <input type="checkbox"/> CS <input type="checkbox"/> NCS |
| Platelet( $\times 10^3/\mu\text{L}$ ) |        | <input type="checkbox"/> CS <input type="checkbox"/> NCS |

Routine Chemistry

| Item                   | Result | If abnormal, check CS NCS                                |
|------------------------|--------|----------------------------------------------------------|
| Inorganic P(mg/dl)     |        | <input type="checkbox"/> CS <input type="checkbox"/> NCS |
| Glucose(mg/dl)         |        | <input type="checkbox"/> CS <input type="checkbox"/> NCS |
| BUN(mg/dl)             |        | <input type="checkbox"/> CS <input type="checkbox"/> NCS |
| Creatinine(mg/dl)      |        | <input type="checkbox"/> CS <input type="checkbox"/> NCS |
| GFR (mL/min)           |        | <input type="checkbox"/> CS <input type="checkbox"/> NCS |
| Uric acid(mg/dl)       |        | <input type="checkbox"/> CS <input type="checkbox"/> NCS |
| Cholesterol(mg/dl)     |        | <input type="checkbox"/> CS <input type="checkbox"/> NCS |
| Calcium(mg/dl)         |        | <input type="checkbox"/> CS <input type="checkbox"/> NCS |
| Total Protein(g/dl)    |        | <input type="checkbox"/> CS <input type="checkbox"/> NCS |
| Albumin(g/dl)          |        | <input type="checkbox"/> CS <input type="checkbox"/> NCS |
| Total bilirubin(mg/dl) |        | <input type="checkbox"/> CS <input type="checkbox"/> NCS |

|                       |  |                             |                              |
|-----------------------|--|-----------------------------|------------------------------|
| Alk.Phosphatase(IU/L) |  | <input type="checkbox"/> CS | <input type="checkbox"/> NCS |
| AST(SGOT)(IU/L)       |  | <input type="checkbox"/> CS | <input type="checkbox"/> NCS |
| ALT(SGPT)(IU/L)       |  | <input type="checkbox"/> CS | <input type="checkbox"/> NCS |
| GGT (IU/L)            |  | <input type="checkbox"/> CS | <input type="checkbox"/> NCS |
| Na (mmol/L)           |  | <input type="checkbox"/> CS | <input type="checkbox"/> NCS |
| K (mmol/L)            |  | <input type="checkbox"/> CS | <input type="checkbox"/> NCS |

## Coagulation test

| item     | Result | If abnormal, check CS NCS   |                              |
|----------|--------|-----------------------------|------------------------------|
| PT(Sec)  |        | <input type="checkbox"/> CS | <input type="checkbox"/> NCS |
| PT (%)   |        | <input type="checkbox"/> CS | <input type="checkbox"/> NCS |
| PT (INR) |        | <input type="checkbox"/> CS | <input type="checkbox"/> NCS |

**Day 7:**

Date of test: (YYYY-MM-DD)

## Complete blood count

| Item                                  | Result | If abnormal, check CS NCS                                |
|---------------------------------------|--------|----------------------------------------------------------|
| WBC( $\times 10^3/\mu\text{L}$ )      |        | <input type="checkbox"/> CS <input type="checkbox"/> NCS |
| Neutrophil (%)                        |        | <input type="checkbox"/> CS <input type="checkbox"/> NCS |
| Lymphocyte (%)                        |        | <input type="checkbox"/> CS <input type="checkbox"/> NCS |
| Monocyte (%)                          |        | <input type="checkbox"/> CS <input type="checkbox"/> NCS |
| Hemoglobin(g/dL)                      |        | <input type="checkbox"/> CS <input type="checkbox"/> NCS |
| Platelet( $\times 10^3/\mu\text{L}$ ) |        | <input type="checkbox"/> CS <input type="checkbox"/> NCS |

## Routine Chemistry

| Item                   | Result | If abnormal, check CS NCS                                |
|------------------------|--------|----------------------------------------------------------|
| Inorganic P(mg/dl)     |        | <input type="checkbox"/> CS <input type="checkbox"/> NCS |
| Glucose(mg/dl)         |        | <input type="checkbox"/> CS <input type="checkbox"/> NCS |
| BUN(mg/dl)             |        | <input type="checkbox"/> CS <input type="checkbox"/> NCS |
| Creatinine(mg/dl)      |        | <input type="checkbox"/> CS <input type="checkbox"/> NCS |
| GFR (mL/min)           |        | <input type="checkbox"/> CS <input type="checkbox"/> NCS |
| Uric acid(mg/dl)       |        | <input type="checkbox"/> CS <input type="checkbox"/> NCS |
| Cholesterol(mg/dl)     |        | <input type="checkbox"/> CS <input type="checkbox"/> NCS |
| Calcium(mg/dl)         |        | <input type="checkbox"/> CS <input type="checkbox"/> NCS |
| Total Protein(g/dl)    |        | <input type="checkbox"/> CS <input type="checkbox"/> NCS |
| Albumin(g/dl)          |        | <input type="checkbox"/> CS <input type="checkbox"/> NCS |
| Total bilirubin(mg/dl) |        | <input type="checkbox"/> CS <input type="checkbox"/> NCS |

|                       |  |                             |                              |
|-----------------------|--|-----------------------------|------------------------------|
| Alk.Phosphatase(IU/L) |  | <input type="checkbox"/> CS | <input type="checkbox"/> NCS |
| AST(SGOT)(IU/L)       |  | <input type="checkbox"/> CS | <input type="checkbox"/> NCS |
| ALT(SGPT)(IU/L)       |  | <input type="checkbox"/> CS | <input type="checkbox"/> NCS |
| GGT (IU/L)            |  | <input type="checkbox"/> CS | <input type="checkbox"/> NCS |
| Na (mmol/L)           |  | <input type="checkbox"/> CS | <input type="checkbox"/> NCS |
| K (mmol/L)            |  | <input type="checkbox"/> CS | <input type="checkbox"/> NCS |

Coagulation test

| item     | Result | If abnormal, check CS NCS   |                              |
|----------|--------|-----------------------------|------------------------------|
| PT(Sec)  |        | <input type="checkbox"/> CS | <input type="checkbox"/> NCS |
| PT (%)   |        | <input type="checkbox"/> CS | <input type="checkbox"/> NCS |
| PT (INR) |        | <input type="checkbox"/> CS | <input type="checkbox"/> NCS |

Sampling for research

Blood  No

Clinical evaluation

| Item,                                                            | Result                                                                                                                                                                    | If abnormal, check CS<br>NCS |
|------------------------------------------------------------------|---------------------------------------------------------------------------------------------------------------------------------------------------------------------------|------------------------------|
| Systolic BP (mmHg)                                               |                                                                                                                                                                           |                              |
| Diastolic BP (mmHg)                                              |                                                                                                                                                                           |                              |
| Pulse rate (bpm)                                                 |                                                                                                                                                                           |                              |
| Pressor<br><input type="checkbox"/> Y <input type="checkbox"/> N | <input type="checkbox"/> Dopamine (dose_ $\mu$ g/min _)<br><input type="checkbox"/> Dobutamine (dose_ $\mu$ g/min _)<br><input type="checkbox"/> Terlipressin (dose_ mg_) |                              |

|                                                                                                  |                                                                                                                                                                                                                                                                                                                                                                                                                                        |  |
|--------------------------------------------------------------------------------------------------|----------------------------------------------------------------------------------------------------------------------------------------------------------------------------------------------------------------------------------------------------------------------------------------------------------------------------------------------------------------------------------------------------------------------------------------|--|
|                                                                                                  | <input type="checkbox"/> Epinephrine (dose__ µg/min _)<br><input type="checkbox"/> Norepinephrine (dose__ µg/min _)                                                                                                                                                                                                                                                                                                                    |  |
| PaO <sub>2</sub><br><input type="checkbox"/> Y <input type="checkbox"/> N                        | ( )mmHg                                                                                                                                                                                                                                                                                                                                                                                                                                |  |
| SpO <sub>2</sub><br><input type="checkbox"/> Y <input type="checkbox"/> N                        | ( ) %                                                                                                                                                                                                                                                                                                                                                                                                                                  |  |
| O <sub>2</sub> supply                                                                            | <input type="checkbox"/> No <input type="checkbox"/> Yes ( ) L/min<br><input type="checkbox"/> facial mask <input type="checkbox"/> nasal prong                                                                                                                                                                                                                                                                                        |  |
| Mechanical ventilation                                                                           | <input type="checkbox"/> Yes (FiO <sub>2</sub> : ) <input type="checkbox"/> No                                                                                                                                                                                                                                                                                                                                                         |  |
| Respiratory rate (/min)                                                                          |                                                                                                                                                                                                                                                                                                                                                                                                                                        |  |
| Body temperature (°C)                                                                            |                                                                                                                                                                                                                                                                                                                                                                                                                                        |  |
| Infection at admission                                                                           | <input type="checkbox"/> Spontaneous bacteremia<br><input type="checkbox"/> SBP<br><input type="checkbox"/> Lower respiratory tract infection<br><input type="checkbox"/> C. difficile<br><input type="checkbox"/> bacterial enterocolitis<br><input type="checkbox"/> skin infection<br><input type="checkbox"/> UTI<br><input type="checkbox"/> intraabdominal infection<br><input type="checkbox"/> secondary bacterial peritonitis |  |
| Gastrointestinal hemorrhage (<br><input type="checkbox"/> Not done <input type="checkbox"/> Done | <input type="checkbox"/> No <input type="checkbox"/> Yes( <input type="checkbox"/> Esophageal varix<br><input type="checkbox"/> Gastric varix<br><input type="checkbox"/> Portal hypertensive gastropathy<br><input type="checkbox"/> Gastric ulcer<br><input type="checkbox"/> Duodenal ulcer                                                                                                                                         |  |

|                                      |                                                                                                                                                                                                     |  |
|--------------------------------------|-----------------------------------------------------------------------------------------------------------------------------------------------------------------------------------------------------|--|
|                                      | <input type="checkbox"/> Mallory-Weiss<br><input type="checkbox"/> Angiodysplasia<br><input type="checkbox"/> etc (_____)                                                                           |  |
| Encephalopathy                       | <input type="checkbox"/> No <input type="checkbox"/> Yes (grade__ [1-4])                                                                                                                            |  |
| Dialysis / renal replacement therapy | <input type="checkbox"/> Not done <input type="checkbox"/> Done                                                                                                                                     |  |
| <b>Lille score</b>                   | <input type="checkbox"/> Complete responder( $\leq 0.16$ )<br><input type="checkbox"/> Partial responder ( $0.16 < \text{Lille} < 0.56$ )<br><input type="checkbox"/> Null responder( $\geq 0.56$ ) |  |

**Day 9**

Date of test: (YYYY-MM-DD)

## Complete blood count

| Item                                | Result | If abnormal, check CS NCS                                |
|-------------------------------------|--------|----------------------------------------------------------|
| WBC( $\chi 10^3/\mu\text{L}$ )      |        | <input type="checkbox"/> CS <input type="checkbox"/> NCS |
| Neutrophil (%)                      |        | <input type="checkbox"/> CS <input type="checkbox"/> NCS |
| Lymphocyte (%)                      |        | <input type="checkbox"/> CS <input type="checkbox"/> NCS |
| Monocyte (%)                        |        | <input type="checkbox"/> CS <input type="checkbox"/> NCS |
| Hemoglobin(g/dL)                    |        | <input type="checkbox"/> CS <input type="checkbox"/> NCS |
| Platelet( $\chi 10^3/\mu\text{L}$ ) |        | <input type="checkbox"/> CS <input type="checkbox"/> NCS |

## Routine Chemistry

| Item                   | Result | If abnormal, check CS NCS                                |
|------------------------|--------|----------------------------------------------------------|
| Inorganic P(mg/dl)     |        | <input type="checkbox"/> CS <input type="checkbox"/> NCS |
| Glucose(mg/dl)         |        | <input type="checkbox"/> CS <input type="checkbox"/> NCS |
| BUN(mg/dl)             |        | <input type="checkbox"/> CS <input type="checkbox"/> NCS |
| Creatinine(mg/dl)      |        | <input type="checkbox"/> CS <input type="checkbox"/> NCS |
| GFR (mL/min)           |        | <input type="checkbox"/> CS <input type="checkbox"/> NCS |
| Uric acid(mg/dl)       |        | <input type="checkbox"/> CS <input type="checkbox"/> NCS |
| Cholesterol(mg/dl)     |        | <input type="checkbox"/> CS <input type="checkbox"/> NCS |
| Calcium(mg/dl)         |        | <input type="checkbox"/> CS <input type="checkbox"/> NCS |
| Total Protein(g/dl)    |        | <input type="checkbox"/> CS <input type="checkbox"/> NCS |
| Albumin(g/dl)          |        | <input type="checkbox"/> CS <input type="checkbox"/> NCS |
| Total bilirubin(mg/dl) |        | <input type="checkbox"/> CS <input type="checkbox"/> NCS |

|                       |  |                             |                              |
|-----------------------|--|-----------------------------|------------------------------|
| Alk.Phosphatase(IU/L) |  | <input type="checkbox"/> CS | <input type="checkbox"/> NCS |
| AST(SGOT)(IU/L)       |  | <input type="checkbox"/> CS | <input type="checkbox"/> NCS |
| ALT(SGPT)(IU/L)       |  | <input type="checkbox"/> CS | <input type="checkbox"/> NCS |
| GGT (IU/L)            |  | <input type="checkbox"/> CS | <input type="checkbox"/> NCS |
| Na (mmol/L)           |  | <input type="checkbox"/> CS | <input type="checkbox"/> NCS |
| K (mmol/L)            |  | <input type="checkbox"/> CS | <input type="checkbox"/> NCS |

## Coagulation test

| item     | Result | If abnormal, check CS NCS   |                              |
|----------|--------|-----------------------------|------------------------------|
| PT(Sec)  |        | <input type="checkbox"/> CS | <input type="checkbox"/> NCS |
| PT (%)   |        | <input type="checkbox"/> CS | <input type="checkbox"/> NCS |
| PT (INR) |        | <input type="checkbox"/> CS | <input type="checkbox"/> NCS |

**Day 11**

Date of test: (YYYY-MM-DD)

## Complete blood count

| Item                                  | Result | If abnormal, check CS NCS                                |
|---------------------------------------|--------|----------------------------------------------------------|
| WBC( $\times 10^3/\mu\text{L}$ )      |        | <input type="checkbox"/> CS <input type="checkbox"/> NCS |
| Neutrophil (%)                        |        | <input type="checkbox"/> CS <input type="checkbox"/> NCS |
| Lymphocyte (%)                        |        | <input type="checkbox"/> CS <input type="checkbox"/> NCS |
| Monocyte (%)                          |        | <input type="checkbox"/> CS <input type="checkbox"/> NCS |
| Hemoglobin(g/dL)                      |        | <input type="checkbox"/> CS <input type="checkbox"/> NCS |
| Platelet( $\times 10^3/\mu\text{L}$ ) |        | <input type="checkbox"/> CS <input type="checkbox"/> NCS |

## Routine Chemistry

| Item                   | Result | If abnormal, check CS NCS                                |
|------------------------|--------|----------------------------------------------------------|
| Inorganic P(mg/dl)     |        | <input type="checkbox"/> CS <input type="checkbox"/> NCS |
| Glucose(mg/dl)         |        | <input type="checkbox"/> CS <input type="checkbox"/> NCS |
| BUN(mg/dl)             |        | <input type="checkbox"/> CS <input type="checkbox"/> NCS |
| Creatinine(mg/dl)      |        | <input type="checkbox"/> CS <input type="checkbox"/> NCS |
| GFR (mL/min)           |        | <input type="checkbox"/> CS <input type="checkbox"/> NCS |
| Uric acid(mg/dl)       |        | <input type="checkbox"/> CS <input type="checkbox"/> NCS |
| Cholesterol(mg/dl)     |        | <input type="checkbox"/> CS <input type="checkbox"/> NCS |
| Calcium(mg/dl)         |        | <input type="checkbox"/> CS <input type="checkbox"/> NCS |
| Total Protein(g/dl)    |        | <input type="checkbox"/> CS <input type="checkbox"/> NCS |
| Albumin(g/dl)          |        | <input type="checkbox"/> CS <input type="checkbox"/> NCS |
| Total bilirubin(mg/dl) |        | <input type="checkbox"/> CS <input type="checkbox"/> NCS |
| Alk.Phosphatase(IU/L)  |        | <input type="checkbox"/> CS <input type="checkbox"/> NCS |

|                 |  |                             |                              |
|-----------------|--|-----------------------------|------------------------------|
| AST(SGOT)(IU/L) |  | <input type="checkbox"/> CS | <input type="checkbox"/> NCS |
| ALT(SGPT)(IU/L) |  | <input type="checkbox"/> CS | <input type="checkbox"/> NCS |
| GGT (IU/L)      |  | <input type="checkbox"/> CS | <input type="checkbox"/> NCS |
| Na (mmol/L)     |  | <input type="checkbox"/> CS | <input type="checkbox"/> NCS |
| K (mmol/L)      |  | <input type="checkbox"/> CS | <input type="checkbox"/> NCS |

## Coagulation test

| item     | Result | If abnormal, check CS NCS   |                              |
|----------|--------|-----------------------------|------------------------------|
| PT(Sec)  |        | <input type="checkbox"/> CS | <input type="checkbox"/> NCS |
| PT (%)   |        | <input type="checkbox"/> CS | <input type="checkbox"/> NCS |
| PT (INR) |        | <input type="checkbox"/> CS | <input type="checkbox"/> NCS |

**Day 14**

Date of test: (YYYY-MM-DD)

## Complete blood count

| Item                                  | Result | If abnormal, check CS NCS                                |
|---------------------------------------|--------|----------------------------------------------------------|
| WBC( $\times 10^3/\mu\text{L}$ )      |        | <input type="checkbox"/> CS <input type="checkbox"/> NCS |
| Neutrophil (%)                        |        | <input type="checkbox"/> CS <input type="checkbox"/> NCS |
| Lymphocyte (%)                        |        | <input type="checkbox"/> CS <input type="checkbox"/> NCS |
| Monocyte (%)                          |        | <input type="checkbox"/> CS <input type="checkbox"/> NCS |
| Hemoglobin(g/dL)                      |        | <input type="checkbox"/> CS <input type="checkbox"/> NCS |
| Platelet( $\times 10^3/\mu\text{L}$ ) |        | <input type="checkbox"/> CS <input type="checkbox"/> NCS |

## Routine Chemistry

| Item                   | Result | If abnormal, check CS NCS                                |
|------------------------|--------|----------------------------------------------------------|
| Inorganic P(mg/dl)     |        | <input type="checkbox"/> CS <input type="checkbox"/> NCS |
| Glucose(mg/dl)         |        | <input type="checkbox"/> CS <input type="checkbox"/> NCS |
| BUN(mg/dl)             |        | <input type="checkbox"/> CS <input type="checkbox"/> NCS |
| Creatinine(mg/dl)      |        | <input type="checkbox"/> CS <input type="checkbox"/> NCS |
| GFR (mL/min)           |        | <input type="checkbox"/> CS <input type="checkbox"/> NCS |
| Uric acid(mg/dl)       |        | <input type="checkbox"/> CS <input type="checkbox"/> NCS |
| Cholesterol(mg/dl)     |        | <input type="checkbox"/> CS <input type="checkbox"/> NCS |
| Calcium(mg/dl)         |        | <input type="checkbox"/> CS <input type="checkbox"/> NCS |
| Total Protein(g/dl)    |        | <input type="checkbox"/> CS <input type="checkbox"/> NCS |
| Albumin(g/dl)          |        | <input type="checkbox"/> CS <input type="checkbox"/> NCS |
| Total bilirubin(mg/dl) |        | <input type="checkbox"/> CS <input type="checkbox"/> NCS |
| Alk.Phosphatase(IU/L)  |        | <input type="checkbox"/> CS <input type="checkbox"/> NCS |

|                 |  |                             |                              |
|-----------------|--|-----------------------------|------------------------------|
| AST(SGOT)(IU/L) |  | <input type="checkbox"/> CS | <input type="checkbox"/> NCS |
| ALT(SGPT)(IU/L) |  | <input type="checkbox"/> CS | <input type="checkbox"/> NCS |
| GGT (IU/L)      |  | <input type="checkbox"/> CS | <input type="checkbox"/> NCS |
| Na (mmol/L)     |  | <input type="checkbox"/> CS | <input type="checkbox"/> NCS |
| K (mmol/L)      |  | <input type="checkbox"/> CS | <input type="checkbox"/> NCS |

## Coagulation test

| item     | Result | If abnormal, check CS NCS   |                              |
|----------|--------|-----------------------------|------------------------------|
| PT(Sec)  |        | <input type="checkbox"/> CS | <input type="checkbox"/> NCS |
| PT (%)   |        | <input type="checkbox"/> CS | <input type="checkbox"/> NCS |
| PT (INR) |        | <input type="checkbox"/> CS | <input type="checkbox"/> NCS |

**Day 17**

Date of test: (YYYY-MM-DD)

## Complete blood count

| Item                                  | Result | If abnormal, check CS NCS                                |
|---------------------------------------|--------|----------------------------------------------------------|
| WBC( $\times 10^3/\mu\text{L}$ )      |        | <input type="checkbox"/> CS <input type="checkbox"/> NCS |
| Neutrophil (%)                        |        | <input type="checkbox"/> CS <input type="checkbox"/> NCS |
| Lymphocyte (%)                        |        | <input type="checkbox"/> CS <input type="checkbox"/> NCS |
| Monocyte (%)                          |        | <input type="checkbox"/> CS <input type="checkbox"/> NCS |
| Hemoglobin(g/dL)                      |        | <input type="checkbox"/> CS <input type="checkbox"/> NCS |
| Platelet( $\times 10^3/\mu\text{L}$ ) |        | <input type="checkbox"/> CS <input type="checkbox"/> NCS |

## Routine Chemistry

| Item                   | Result | If abnormal, check CS NCS                                |
|------------------------|--------|----------------------------------------------------------|
| Inorganic P(mg/dl)     |        | <input type="checkbox"/> CS <input type="checkbox"/> NCS |
| Glucose(mg/dl)         |        | <input type="checkbox"/> CS <input type="checkbox"/> NCS |
| BUN(mg/dl)             |        | <input type="checkbox"/> CS <input type="checkbox"/> NCS |
| Creatinine(mg/dl)      |        | <input type="checkbox"/> CS <input type="checkbox"/> NCS |
| GFR (mL/min)           |        | <input type="checkbox"/> CS <input type="checkbox"/> NCS |
| Uric acid(mg/dl)       |        | <input type="checkbox"/> CS <input type="checkbox"/> NCS |
| Cholesterol(mg/dl)     |        | <input type="checkbox"/> CS <input type="checkbox"/> NCS |
| Calcium(mg/dl)         |        | <input type="checkbox"/> CS <input type="checkbox"/> NCS |
| Total Protein(g/dl)    |        | <input type="checkbox"/> CS <input type="checkbox"/> NCS |
| Albumin(g/dl)          |        | <input type="checkbox"/> CS <input type="checkbox"/> NCS |
| Total bilirubin(mg/dl) |        | <input type="checkbox"/> CS <input type="checkbox"/> NCS |
| Alk.Phosphatase(IU/L)  |        | <input type="checkbox"/> CS <input type="checkbox"/> NCS |

|                 |  |                             |                              |
|-----------------|--|-----------------------------|------------------------------|
| AST(SGOT)(IU/L) |  | <input type="checkbox"/> CS | <input type="checkbox"/> NCS |
| ALT(SGPT)(IU/L) |  | <input type="checkbox"/> CS | <input type="checkbox"/> NCS |
| GGT (IU/L)      |  | <input type="checkbox"/> CS | <input type="checkbox"/> NCS |
| Na (mmol/L)     |  | <input type="checkbox"/> CS | <input type="checkbox"/> NCS |
| K (mmol/L)      |  | <input type="checkbox"/> CS | <input type="checkbox"/> NCS |

## Coagulation test

| item     | Result | If abnormal, check CS NCS   |                              |
|----------|--------|-----------------------------|------------------------------|
| PT(Sec)  |        | <input type="checkbox"/> CS | <input type="checkbox"/> NCS |
| PT (%)   |        | <input type="checkbox"/> CS | <input type="checkbox"/> NCS |
| PT (INR) |        | <input type="checkbox"/> CS | <input type="checkbox"/> NCS |

**Day 20**

Date of test: (YYYY-MM-DD)

## Complete blood count

| Item                                  | Result | If abnormal, check CS NCS                                |
|---------------------------------------|--------|----------------------------------------------------------|
| WBC( $\times 10^3/\mu\text{L}$ )      |        | <input type="checkbox"/> CS <input type="checkbox"/> NCS |
| Neutrophil (%)                        |        | <input type="checkbox"/> CS <input type="checkbox"/> NCS |
| Lymphocyte (%)                        |        | <input type="checkbox"/> CS <input type="checkbox"/> NCS |
| Monocyte (%)                          |        | <input type="checkbox"/> CS <input type="checkbox"/> NCS |
| Hemoglobin(g/dL)                      |        | <input type="checkbox"/> CS <input type="checkbox"/> NCS |
| Platelet( $\times 10^3/\mu\text{L}$ ) |        | <input type="checkbox"/> CS <input type="checkbox"/> NCS |

## Routine Chemistry

| Item                   | Result | If abnormal, check CS NCS                                |
|------------------------|--------|----------------------------------------------------------|
| Inorganic P(mg/dl)     |        | <input type="checkbox"/> CS <input type="checkbox"/> NCS |
| Glucose(mg/dl)         |        | <input type="checkbox"/> CS <input type="checkbox"/> NCS |
| BUN(mg/dl)             |        | <input type="checkbox"/> CS <input type="checkbox"/> NCS |
| Creatinine(mg/dl)      |        | <input type="checkbox"/> CS <input type="checkbox"/> NCS |
| GFR (mL/min)           |        | <input type="checkbox"/> CS <input type="checkbox"/> NCS |
| Uric acid(mg/dl)       |        | <input type="checkbox"/> CS <input type="checkbox"/> NCS |
| Cholesterol(mg/dl)     |        | <input type="checkbox"/> CS <input type="checkbox"/> NCS |
| Calcium(mg/dl)         |        | <input type="checkbox"/> CS <input type="checkbox"/> NCS |
| Total Protein(g/dl)    |        | <input type="checkbox"/> CS <input type="checkbox"/> NCS |
| Albumin(g/dl)          |        | <input type="checkbox"/> CS <input type="checkbox"/> NCS |
| Total bilirubin(mg/dl) |        | <input type="checkbox"/> CS <input type="checkbox"/> NCS |
| Alk.Phosphatase(IU/L)  |        | <input type="checkbox"/> CS <input type="checkbox"/> NCS |

|                 |  |                             |                              |
|-----------------|--|-----------------------------|------------------------------|
| AST(SGOT)(IU/L) |  | <input type="checkbox"/> CS | <input type="checkbox"/> NCS |
| ALT(SGPT)(IU/L) |  | <input type="checkbox"/> CS | <input type="checkbox"/> NCS |
| GGT (IU/L)      |  | <input type="checkbox"/> CS | <input type="checkbox"/> NCS |
| Na (mmol/L)     |  | <input type="checkbox"/> CS | <input type="checkbox"/> NCS |
| K (mmol/L)      |  | <input type="checkbox"/> CS | <input type="checkbox"/> NCS |

## Coagulation test

| item     | Result | If abnormal, check CS NCS   |                              |
|----------|--------|-----------------------------|------------------------------|
| PT(Sec)  |        | <input type="checkbox"/> CS | <input type="checkbox"/> NCS |
| PT (%)   |        | <input type="checkbox"/> CS | <input type="checkbox"/> NCS |
| PT (INR) |        | <input type="checkbox"/> CS | <input type="checkbox"/> NCS |

**Day 23**

Date of test: (YYYY-MM-DD)

## Complete blood count

| Item                                  | Result | If abnormal, check CS NCS                                |
|---------------------------------------|--------|----------------------------------------------------------|
| WBC( $\times 10^3/\mu\text{L}$ )      |        | <input type="checkbox"/> CS <input type="checkbox"/> NCS |
| Neutrophil (%)                        |        | <input type="checkbox"/> CS <input type="checkbox"/> NCS |
| Lymphocyte (%)                        |        | <input type="checkbox"/> CS <input type="checkbox"/> NCS |
| Monocyte (%)                          |        | <input type="checkbox"/> CS <input type="checkbox"/> NCS |
| Hemoglobin(g/dL)                      |        | <input type="checkbox"/> CS <input type="checkbox"/> NCS |
| Platelet( $\times 10^3/\mu\text{L}$ ) |        | <input type="checkbox"/> CS <input type="checkbox"/> NCS |

## Routine Chemistry

| Item                   | Result | If abnormal, check CS NCS                                |
|------------------------|--------|----------------------------------------------------------|
| Inorganic P(mg/dl)     |        | <input type="checkbox"/> CS <input type="checkbox"/> NCS |
| Glucose(mg/dl)         |        | <input type="checkbox"/> CS <input type="checkbox"/> NCS |
| BUN(mg/dl)             |        | <input type="checkbox"/> CS <input type="checkbox"/> NCS |
| Creatinine(mg/dl)      |        | <input type="checkbox"/> CS <input type="checkbox"/> NCS |
| GFR (mL/min)           |        | <input type="checkbox"/> CS <input type="checkbox"/> NCS |
| Uric acid(mg/dl)       |        | <input type="checkbox"/> CS <input type="checkbox"/> NCS |
| Cholesterol(mg/dl)     |        | <input type="checkbox"/> CS <input type="checkbox"/> NCS |
| Calcium(mg/dl)         |        | <input type="checkbox"/> CS <input type="checkbox"/> NCS |
| Total Protein(g/dl)    |        | <input type="checkbox"/> CS <input type="checkbox"/> NCS |
| Albumin(g/dl)          |        | <input type="checkbox"/> CS <input type="checkbox"/> NCS |
| Total bilirubin(mg/dl) |        | <input type="checkbox"/> CS <input type="checkbox"/> NCS |
| Alk.Phosphatase(IU/L)  |        | <input type="checkbox"/> CS <input type="checkbox"/> NCS |

|                 |  |                             |                              |
|-----------------|--|-----------------------------|------------------------------|
| AST(SGOT)(IU/L) |  | <input type="checkbox"/> CS | <input type="checkbox"/> NCS |
| ALT(SGPT)(IU/L) |  | <input type="checkbox"/> CS | <input type="checkbox"/> NCS |
| GGT (IU/L)      |  | <input type="checkbox"/> CS | <input type="checkbox"/> NCS |
| Na (mmol/L)     |  | <input type="checkbox"/> CS | <input type="checkbox"/> NCS |
| K (mmol/L)      |  | <input type="checkbox"/> CS | <input type="checkbox"/> NCS |

## Coagulation test

| item     | Result | If abnormal, check CS NCS   |                              |
|----------|--------|-----------------------------|------------------------------|
| PT(Sec)  |        | <input type="checkbox"/> CS | <input type="checkbox"/> NCS |
| PT (%)   |        | <input type="checkbox"/> CS | <input type="checkbox"/> NCS |
| PT (INR) |        | <input type="checkbox"/> CS | <input type="checkbox"/> NCS |

**Day 26**

Date of test: (YYYY-MM-DD)

## Complete blood count

| Item                                  | Result | If abnormal, check CS NCS                                |
|---------------------------------------|--------|----------------------------------------------------------|
| WBC( $\times 10^3/\mu\text{L}$ )      |        | <input type="checkbox"/> CS <input type="checkbox"/> NCS |
| Neutrophil (%)                        |        | <input type="checkbox"/> CS <input type="checkbox"/> NCS |
| Lymphocyte (%)                        |        | <input type="checkbox"/> CS <input type="checkbox"/> NCS |
| Monocyte (%)                          |        | <input type="checkbox"/> CS <input type="checkbox"/> NCS |
| Hemoglobin(g/dL)                      |        | <input type="checkbox"/> CS <input type="checkbox"/> NCS |
| Platelet( $\times 10^3/\mu\text{L}$ ) |        | <input type="checkbox"/> CS <input type="checkbox"/> NCS |

## Routine Chemistry

| Item                   | Result | If abnormal, check CS NCS                                |
|------------------------|--------|----------------------------------------------------------|
| Inorganic P(mg/dl)     |        | <input type="checkbox"/> CS <input type="checkbox"/> NCS |
| Glucose(mg/dl)         |        | <input type="checkbox"/> CS <input type="checkbox"/> NCS |
| BUN(mg/dl)             |        | <input type="checkbox"/> CS <input type="checkbox"/> NCS |
| Creatinine(mg/dl)      |        | <input type="checkbox"/> CS <input type="checkbox"/> NCS |
| GFR (mL/min)           |        | <input type="checkbox"/> CS <input type="checkbox"/> NCS |
| Uric acid(mg/dl)       |        | <input type="checkbox"/> CS <input type="checkbox"/> NCS |
| Cholesterol(mg/dl)     |        | <input type="checkbox"/> CS <input type="checkbox"/> NCS |
| Calcium(mg/dl)         |        | <input type="checkbox"/> CS <input type="checkbox"/> NCS |
| Total Protein(g/dl)    |        | <input type="checkbox"/> CS <input type="checkbox"/> NCS |
| Albumin(g/dl)          |        | <input type="checkbox"/> CS <input type="checkbox"/> NCS |
| Total bilirubin(mg/dl) |        | <input type="checkbox"/> CS <input type="checkbox"/> NCS |
| Alk.Phosphatase(IU/L)  |        | <input type="checkbox"/> CS <input type="checkbox"/> NCS |

|                 |  |                             |                              |
|-----------------|--|-----------------------------|------------------------------|
| AST(SGOT)(IU/L) |  | <input type="checkbox"/> CS | <input type="checkbox"/> NCS |
| ALT(SGPT)(IU/L) |  | <input type="checkbox"/> CS | <input type="checkbox"/> NCS |
| GGT (IU/L)      |  | <input type="checkbox"/> CS | <input type="checkbox"/> NCS |
| Na (mmol/L)     |  | <input type="checkbox"/> CS | <input type="checkbox"/> NCS |
| K (mmol/L)      |  | <input type="checkbox"/> CS | <input type="checkbox"/> NCS |

## Coagulation test

| item     | Result | If abnormal, check CS NCS   |                              |
|----------|--------|-----------------------------|------------------------------|
| PT(Sec)  |        | <input type="checkbox"/> CS | <input type="checkbox"/> NCS |
| PT (%)   |        | <input type="checkbox"/> CS | <input type="checkbox"/> NCS |
| PT (INR) |        | <input type="checkbox"/> CS | <input type="checkbox"/> NCS |

**Day 29**

Date of test: (YYYY-MM-DD)

## Complete blood count

| Item                                  | Result | If abnormal, check CS NCS                                |
|---------------------------------------|--------|----------------------------------------------------------|
| WBC( $\times 10^3/\mu\text{L}$ )      |        | <input type="checkbox"/> CS <input type="checkbox"/> NCS |
| Neutrophil (%)                        |        | <input type="checkbox"/> CS <input type="checkbox"/> NCS |
| Lymphocyte (%)                        |        | <input type="checkbox"/> CS <input type="checkbox"/> NCS |
| Monocyte (%)                          |        | <input type="checkbox"/> CS <input type="checkbox"/> NCS |
| Hemoglobin(g/dL)                      |        | <input type="checkbox"/> CS <input type="checkbox"/> NCS |
| Platelet( $\times 10^3/\mu\text{L}$ ) |        | <input type="checkbox"/> CS <input type="checkbox"/> NCS |

## Routine Chemistry

| Item                   | Result | If abnormal, check CS NCS                                |
|------------------------|--------|----------------------------------------------------------|
| Inorganic P(mg/dl)     |        | <input type="checkbox"/> CS <input type="checkbox"/> NCS |
| Glucose(mg/dl)         |        | <input type="checkbox"/> CS <input type="checkbox"/> NCS |
| BUN(mg/dl)             |        | <input type="checkbox"/> CS <input type="checkbox"/> NCS |
| Creatinine(mg/dl)      |        | <input type="checkbox"/> CS <input type="checkbox"/> NCS |
| GFR (mL/min)           |        | <input type="checkbox"/> CS <input type="checkbox"/> NCS |
| Uric acid(mg/dl)       |        | <input type="checkbox"/> CS <input type="checkbox"/> NCS |
| Cholesterol(mg/dl)     |        | <input type="checkbox"/> CS <input type="checkbox"/> NCS |
| Calcium(mg/dl)         |        | <input type="checkbox"/> CS <input type="checkbox"/> NCS |
| Total Protein(g/dl)    |        | <input type="checkbox"/> CS <input type="checkbox"/> NCS |
| Albumin(g/dl)          |        | <input type="checkbox"/> CS <input type="checkbox"/> NCS |
| Total bilirubin(mg/dl) |        | <input type="checkbox"/> CS <input type="checkbox"/> NCS |
| Alk.Phosphatase(IU/L)  |        | <input type="checkbox"/> CS <input type="checkbox"/> NCS |

|                 |  |                             |                              |
|-----------------|--|-----------------------------|------------------------------|
| AST(SGOT)(IU/L) |  | <input type="checkbox"/> CS | <input type="checkbox"/> NCS |
| ALT(SGPT)(IU/L) |  | <input type="checkbox"/> CS | <input type="checkbox"/> NCS |
| GGT (IU/L)      |  | <input type="checkbox"/> CS | <input type="checkbox"/> NCS |
| Na (mmol/L)     |  | <input type="checkbox"/> CS | <input type="checkbox"/> NCS |
| K (mmol/L)      |  | <input type="checkbox"/> CS | <input type="checkbox"/> NCS |

## Coagulation test

| item     | Result | If abnormal, check CS NCS   |                              |
|----------|--------|-----------------------------|------------------------------|
| PT(Sec)  |        | <input type="checkbox"/> CS | <input type="checkbox"/> NCS |
| PT (%)   |        | <input type="checkbox"/> CS | <input type="checkbox"/> NCS |
| PT (INR) |        | <input type="checkbox"/> CS | <input type="checkbox"/> NCS |

**Day 32**

Date of test: (YYYY-MM-DD)

## Complete blood count

| Item                                  | Result | If abnormal, check CS NCS                                |
|---------------------------------------|--------|----------------------------------------------------------|
| WBC( $\times 10^3/\mu\text{L}$ )      |        | <input type="checkbox"/> CS <input type="checkbox"/> NCS |
| Neutrophil (%)                        |        | <input type="checkbox"/> CS <input type="checkbox"/> NCS |
| Lymphocyte (%)                        |        | <input type="checkbox"/> CS <input type="checkbox"/> NCS |
| Monocyte (%)                          |        | <input type="checkbox"/> CS <input type="checkbox"/> NCS |
| Hemoglobin(g/dL)                      |        | <input type="checkbox"/> CS <input type="checkbox"/> NCS |
| Platelet( $\times 10^3/\mu\text{L}$ ) |        | <input type="checkbox"/> CS <input type="checkbox"/> NCS |

## Routine Chemistry

| Item                   | Result | If abnormal, check CS NCS                                |
|------------------------|--------|----------------------------------------------------------|
| Inorganic P(mg/dl)     |        | <input type="checkbox"/> CS <input type="checkbox"/> NCS |
| Glucose(mg/dl)         |        | <input type="checkbox"/> CS <input type="checkbox"/> NCS |
| BUN(mg/dl)             |        | <input type="checkbox"/> CS <input type="checkbox"/> NCS |
| Creatinine(mg/dl)      |        | <input type="checkbox"/> CS <input type="checkbox"/> NCS |
| GFR (mL/min)           |        | <input type="checkbox"/> CS <input type="checkbox"/> NCS |
| Uric acid(mg/dl)       |        | <input type="checkbox"/> CS <input type="checkbox"/> NCS |
| Cholesterol(mg/dl)     |        | <input type="checkbox"/> CS <input type="checkbox"/> NCS |
| Calcium(mg/dl)         |        | <input type="checkbox"/> CS <input type="checkbox"/> NCS |
| Total Protein(g/dl)    |        | <input type="checkbox"/> CS <input type="checkbox"/> NCS |
| Albumin(g/dl)          |        | <input type="checkbox"/> CS <input type="checkbox"/> NCS |
| Total bilirubin(mg/dl) |        | <input type="checkbox"/> CS <input type="checkbox"/> NCS |
| Alk.Phosphatase(IU/L)  |        | <input type="checkbox"/> CS <input type="checkbox"/> NCS |

|                 |  |                             |                              |
|-----------------|--|-----------------------------|------------------------------|
| AST(SGOT)(IU/L) |  | <input type="checkbox"/> CS | <input type="checkbox"/> NCS |
| ALT(SGPT)(IU/L) |  | <input type="checkbox"/> CS | <input type="checkbox"/> NCS |
| GGT (IU/L)      |  | <input type="checkbox"/> CS | <input type="checkbox"/> NCS |
| Na (mmol/L)     |  | <input type="checkbox"/> CS | <input type="checkbox"/> NCS |
| K (mmol/L)      |  | <input type="checkbox"/> CS | <input type="checkbox"/> NCS |

## Coagulation test

| item     | Result | If abnormal, check CS NCS   |                              |
|----------|--------|-----------------------------|------------------------------|
| PT(Sec)  |        | <input type="checkbox"/> CS | <input type="checkbox"/> NCS |
| PT (%)   |        | <input type="checkbox"/> CS | <input type="checkbox"/> NCS |
| PT (INR) |        | <input type="checkbox"/> CS | <input type="checkbox"/> NCS |

**Day 35**

Date of test: (YYYY-MM-DD)

## Complete blood count

| Item                                | Result | If abnormal, check CS NCS                                |
|-------------------------------------|--------|----------------------------------------------------------|
| WBC( $\chi 10^3/\mu\text{L}$ )      |        | <input type="checkbox"/> CS <input type="checkbox"/> NCS |
| Neutrophil (%)                      |        | <input type="checkbox"/> CS <input type="checkbox"/> NCS |
| Lymphocyte (%)                      |        | <input type="checkbox"/> CS <input type="checkbox"/> NCS |
| Monocyte (%)                        |        | <input type="checkbox"/> CS <input type="checkbox"/> NCS |
| Hemoglobin(g/dL)                    |        | <input type="checkbox"/> CS <input type="checkbox"/> NCS |
| Platelet( $\chi 10^3/\mu\text{L}$ ) |        | <input type="checkbox"/> CS <input type="checkbox"/> NCS |

## Routine Chemistry

| Item                   | Result | If abnormal, check CS NCS                                |
|------------------------|--------|----------------------------------------------------------|
| Inorganic P(mg/dl)     |        | <input type="checkbox"/> CS <input type="checkbox"/> NCS |
| Glucose(mg/dl)         |        | <input type="checkbox"/> CS <input type="checkbox"/> NCS |
| BUN(mg/dl)             |        | <input type="checkbox"/> CS <input type="checkbox"/> NCS |
| Creatinine(mg/dl)      |        | <input type="checkbox"/> CS <input type="checkbox"/> NCS |
| GFR (mL/min)           |        | <input type="checkbox"/> CS <input type="checkbox"/> NCS |
| Uric acid(mg/dl)       |        | <input type="checkbox"/> CS <input type="checkbox"/> NCS |
| Cholesterol(mg/dl)     |        | <input type="checkbox"/> CS <input type="checkbox"/> NCS |
| Calcium(mg/dl)         |        | <input type="checkbox"/> CS <input type="checkbox"/> NCS |
| Total Protein(g/dl)    |        | <input type="checkbox"/> CS <input type="checkbox"/> NCS |
| Albumin(g/dl)          |        | <input type="checkbox"/> CS <input type="checkbox"/> NCS |
| Total bilirubin(mg/dl) |        | <input type="checkbox"/> CS <input type="checkbox"/> NCS |

|                       |  |                             |                              |
|-----------------------|--|-----------------------------|------------------------------|
| Alk.Phosphatase(IU/L) |  | <input type="checkbox"/> CS | <input type="checkbox"/> NCS |
| AST(SGOT)(IU/L)       |  | <input type="checkbox"/> CS | <input type="checkbox"/> NCS |
| ALT(SGPT)(IU/L)       |  | <input type="checkbox"/> CS | <input type="checkbox"/> NCS |
| GGT (IU/L)            |  | <input type="checkbox"/> CS | <input type="checkbox"/> NCS |
| Na (mmol/L)           |  | <input type="checkbox"/> CS | <input type="checkbox"/> NCS |
| K (mmol/L)            |  | <input type="checkbox"/> CS | <input type="checkbox"/> NCS |

Coagulation test

| item     | Result | If abnormal, check CS NCS   |                              |
|----------|--------|-----------------------------|------------------------------|
| PT(Sec)  |        | <input type="checkbox"/> CS | <input type="checkbox"/> NCS |
| PT (%)   |        | <input type="checkbox"/> CS | <input type="checkbox"/> NCS |
| PT (INR) |        | <input type="checkbox"/> CS | <input type="checkbox"/> NCS |

Urinalysis

| Specimen   | Item            | Result | If abnormal, check CS NCS                                |
|------------|-----------------|--------|----------------------------------------------------------|
| Urinalysis | WBC(/HPF)       |        | <input type="checkbox"/> CS <input type="checkbox"/> NCS |
|            | RBC(/HPF)       |        | <input type="checkbox"/> CS <input type="checkbox"/> NCS |
|            | cast            |        | <input type="checkbox"/> CS <input type="checkbox"/> NCS |
|            | bacteria        |        | <input type="checkbox"/> CS <input type="checkbox"/> NCS |
|            | bilirubin       |        | <input type="checkbox"/> CS <input type="checkbox"/> NCS |
|            | nitrite         |        | <input type="checkbox"/> CS <input type="checkbox"/> NCS |
|            | Na/K/Cl(mmol/L) |        | <input type="checkbox"/> CS <input type="checkbox"/> NCS |

Sampling for research

Blood  Liver tissue  No

## Clinical evaluation

| Item                                                                      | Result                                                                                                                                                                                                                                                                                                   | If abnormal, check CS NCS |
|---------------------------------------------------------------------------|----------------------------------------------------------------------------------------------------------------------------------------------------------------------------------------------------------------------------------------------------------------------------------------------------------|---------------------------|
| Systolic BP (mmHg)                                                        |                                                                                                                                                                                                                                                                                                          |                           |
| Diastolic BP (mmHg)                                                       |                                                                                                                                                                                                                                                                                                          |                           |
| Pulse rate (bpm)                                                          |                                                                                                                                                                                                                                                                                                          |                           |
| Pressor                                                                   | <input type="checkbox"/> Dopamine (dose_ $\mu$ g/min _)<br><input type="checkbox"/> Dobutamine (dose_ $\mu$ g/min )<br><input type="checkbox"/> Terlipressin (dose_ mg_)<br><input type="checkbox"/> Epinephrine (dose_ $\mu$ g/min)<br><input type="checkbox"/> Norepinephrine<br>(dose_ $\mu$ g/min _) |                           |
| PaO <sub>2</sub><br><input type="checkbox"/> Y <input type="checkbox"/> N | ( ) mmHg                                                                                                                                                                                                                                                                                                 |                           |
| SpO <sub>2</sub><br><input type="checkbox"/> Y <input type="checkbox"/> N | ( ) %                                                                                                                                                                                                                                                                                                    |                           |
| O <sub>2</sub> supply                                                     | ( ) L/min<br><input type="checkbox"/> facial mask <input type="checkbox"/> nasal prong                                                                                                                                                                                                                   |                           |
| Mechanical ventilation                                                    | <input type="checkbox"/> Yes (FiO <sub>2</sub> : ) <input type="checkbox"/> No                                                                                                                                                                                                                           |                           |
| Respiratory rate (/min)                                                   |                                                                                                                                                                                                                                                                                                          |                           |
| Body temperature (°C)                                                     |                                                                                                                                                                                                                                                                                                          |                           |
| Infection at admission                                                    | <input type="checkbox"/> Spontaneous bacteremia <input type="checkbox"/><br>SBP <input type="checkbox"/> Lower respiratory tract<br>infection <input type="checkbox"/> C. difficile <input type="checkbox"/>                                                                                             |                           |

|                                                                                                |                                                                                                                                                                                                                                                                                                                                                                                                               |  |
|------------------------------------------------------------------------------------------------|---------------------------------------------------------------------------------------------------------------------------------------------------------------------------------------------------------------------------------------------------------------------------------------------------------------------------------------------------------------------------------------------------------------|--|
|                                                                                                | bacterial enterocolitis <input type="checkbox"/> skin infection <input type="checkbox"/> UTI <input type="checkbox"/><br>intraabdominal infection<br><input type="checkbox"/> secondary bacterial peritonitis                                                                                                                                                                                                 |  |
| Gastrointestinal hemorrhage<br><input type="checkbox"/> Not done <input type="checkbox"/> Done | <input type="checkbox"/> No <input type="checkbox"/> Yes<br>( <input type="checkbox"/> Esophageal varix <input type="checkbox"/> Gastric varix <input type="checkbox"/> Portal hypertensive gastropathy <input type="checkbox"/> Gastric ulcer <input type="checkbox"/> Duodenal ulcer <input type="checkbox"/> Mallory-Weiss <input type="checkbox"/> Angiodysplasia<br><input type="checkbox"/> etc (____)) |  |
| Encephalopathy                                                                                 | <input type="checkbox"/> No <input type="checkbox"/> Yes (grade__ [1-4])                                                                                                                                                                                                                                                                                                                                      |  |
| Dialysis / renal replacement therapy                                                           | <input type="checkbox"/> Not done <input type="checkbox"/> Done                                                                                                                                                                                                                                                                                                                                               |  |

Imaging test:  Yes  No

Date: (YYYY-MM-DD)

Result:

Tissue (histologic evaluation, HVPG)

| Item                                                                          | Result                                    | If abnormal, check CS NCS |
|-------------------------------------------------------------------------------|-------------------------------------------|---------------------------|
| HVPG<br><input type="checkbox"/> Y <input type="checkbox"/> N<br>(YYYY-MM-DD) | ( )mmHg                                   |                           |
| Histologic scoring                                                            | hepatocellular damage/ballooning (0=mild; |                           |

|                                                                                                                   |       |                                                                                                                                                                                |  |
|-------------------------------------------------------------------------------------------------------------------|-------|--------------------------------------------------------------------------------------------------------------------------------------------------------------------------------|--|
| (transjugular<br>percutaneous<br>biopsy)<br><input type="checkbox"/> Y <input type="checkbox"/> N<br>(YYYY-MM-DD) | or    | 1=marked)                                                                                                                                                                      |  |
|                                                                                                                   | liver | Mallory bodies (0=absent; 1=present)                                                                                                                                           |  |
|                                                                                                                   |       | Polymorphonuclear (PMN) infiltration<br>(0=mild; 1=moderate/severe)                                                                                                            |  |
|                                                                                                                   |       | Steatosis (0, <33%; 1, 33 - 66%; 2, >66%)                                                                                                                                      |  |
|                                                                                                                   |       | Lobular fibrosis (0=no fibrosis or zone 3;<br>1=fibrosis in zone 2+3; 2=panlobular<br>fibrosis),                                                                               |  |
|                                                                                                                   |       | Fibrosis stage (0=no fibrosis or portal<br>fibrosis; 1= expansive periportal fibrosis; 2=<br>bridging fibrosis and cirrhosis)                                                  |  |
|                                                                                                                   |       | Megamitochondria (0=no; 1=yes)                                                                                                                                                 |  |
|                                                                                                                   |       | Bilirubinostasis (0=none; 1=hepatocellular<br>bilirubinostasis; 2=canalicular or ductular<br>bilirubinostasis; 3=hepatocellular +<br>canalicular or ductular bilirubinostasis) |  |

**< Re-evaluation items during hospitalization >****1. Nosocomial or second infection (Recorded each time it occurs)**

- date: YYYY-MM-DD

- Admission 48 hours - Infection-related symptoms until discharge

cough sputum production dyspnea pleuritic pain diarrhea

- Infection-related physical examination and examination findings

rale crepitation shivering cellulitis intraabdominal infection evidence (diverticulitis appendicitis cholangitis) C.difficile antibody

- Type of infection

Spontaneous bacteremia SBP Lower respiratory tract infection C. difficile bacterial enterocolitis skin infection UTI intraabdominal infection secondary bacterial peritonitis

-Presence of SIRS: Body temperature ( )°C Heart rate ( )/min RR ( )/min WBC(date of infection determination) ( )/μL

**2. Presence of ACLF (acute-on-chronic liver failure)**

1) Liver (bilirubin)

- Date of aggravation: YYYY-MM-DD

- value: ( )mg/dL

2) Kidney (creatinine)

- Date of aggravation: YYYY-MM-DD

- value: ( )mg/dL

- new Renal Replacement Therapy: None Done

3) Cerebral (HE grade)

- Date of aggravation: YYYY-MM-DD

- Grade (I-IV)

4) Coagulation

- Date of aggravation: YYYY-MM-DD
- value: INR ( ) platelet [if < 20,000/ $\mu$ L] ( )/ $\mu$ L

## 5) Circulation (BP)

- Date of aggravation: YYYY-MM-DD
- value: sBP ( ) dBP ( )mmHg
- new pressor: Dopamine (dose\_\_  $\mu$ g/min) Dobutamine (dose\_\_  $\mu$ g/min) Terlipressin (dose\_\_mg\_)
- Epinephrine (dose\_\_  $\mu$ g/min) Norepinephrine (dose\_\_  $\mu$ g/min)

## 6) Lung

- Date of aggravation: YYYY-MM-DD
- PaO<sub>2</sub> (ABGA) ( )mmHg SpO<sub>2</sub> ( )%
- O<sub>2</sub> ( )L/min  facial mask  nasal prong
- Mechanical ventilation: Yes (FiO<sub>2</sub>: ) No

**3. Endpoint**

## 1) During hospitalization

- Date: YYYY-MM-DD
- Endpoint:  Survival(recovery)  Survival (transfer)  Death  Transplantation (LDLT\_\_(donor:\_\_\_)/DDLTL\_\_)

## 2) After discharge

- Last visit date (or date of death): YYYY-MM-DD
- Endpoint:  Survival  Death  Unknown

## 3) Cause of death

- Liver failure ACLF Infection/sepsis Gastrointestinal bleeding Hepatorenal syndrome Etc(describe)\_\_\_

Adverse Event  Yes  No

Subject number:

Initial:

| Adverse Event | Date of occurrence (YYYY/MM/DD) | Date of lost (YYYY/MM/DD)<br>( <input type="checkbox"/> continuous) | Grade (A) | Serious (B) | Result (C) | Causal relationship (D) | Treatment (E) | IP interruption (F) | IP restart date (YYYY/MM/DD) |
|---------------|---------------------------------|---------------------------------------------------------------------|-----------|-------------|------------|-------------------------|---------------|---------------------|------------------------------|
|               | ____/____/____                  | ____/____/____<br>( <input type="checkbox"/> continuous)            |           |             |            |                         |               |                     | ____/____/____               |
|               | ____/____/____                  | ____/____/____<br>( <input type="checkbox"/> continuous)            |           |             |            |                         |               |                     | ____/____/____               |
|               | ____/____/____                  | ____/____/____<br>( <input type="checkbox"/> continuous)            |           |             |            |                         |               |                     | ____/____/____               |
|               | ____/____/____                  | ____/____/____<br>( <input type="checkbox"/> continuous)            |           |             |            |                         |               |                     | ____/____/____               |
|               | ____/____/____                  | ____/____/____<br>( <input type="checkbox"/> continuous)            |           |             |            |                         |               |                     | ____/____/____               |
|               | ____/____/____                  | ____/____/____<br>( <input type="checkbox"/> continuous)            |           |             |            |                         |               |                     | ____/____/____               |
|               | ____/____/____                  | ____/____/____<br>( <input type="checkbox"/> continuous)            |           |             |            |                         |               |                     | ____/____/____               |

Grade (A) 1=Mild, 2=Moderate, 3=Severe  
 Serious (B) 1=not serious, 2=Serious, (if SAE, please report)  
 Result (C) 1=recovery, without complication, 2= recovery, with complication, 3=continous, no need for follow-up, 4= continous, follow-up loss, 5=death  
 Causal relationship (D) 1=relation (+), 2= relation (-), 3=Impossible evaluation, 4=NA  
 Treatment (E) 1=No treatment, 2=Medication, 3=Non-medical treatment, 4=Admission/prologation of admission  
 IP interruption 1= Permanent interruption, 2= Temporary interruption, 3=No interruption, 4=NA

(F)

| Drug (Ingredients)            |           | Purpose               |           | Daily dose | Dosage unit <sup>(1)</sup> | Route of administration <sup>(2)</sup> | Start date of administration (DD/MMM/YYYY) | End date of administration (DD/MMM/YYYY) | During administration    |           |                     |  |
|-------------------------------|-----------|-----------------------|-----------|------------|----------------------------|----------------------------------------|--------------------------------------------|------------------------------------------|--------------------------|-----------|---------------------|--|
|                               |           |                       |           |            |                            |                                        |                                            |                                          | <input type="checkbox"/> |           |                     |  |
|                               |           |                       |           |            |                            |                                        |                                            |                                          | <input type="checkbox"/> |           |                     |  |
|                               |           |                       |           |            |                            |                                        |                                            |                                          | <input type="checkbox"/> |           |                     |  |
|                               |           |                       |           |            |                            |                                        |                                            |                                          | <input type="checkbox"/> |           |                     |  |
|                               |           |                       |           |            |                            |                                        |                                            |                                          | <input type="checkbox"/> |           |                     |  |
|                               |           |                       |           |            |                            |                                        |                                            |                                          | <input type="checkbox"/> |           |                     |  |
|                               |           |                       |           |            |                            |                                        |                                            |                                          | <input type="checkbox"/> |           |                     |  |
|                               |           |                       |           |            |                            |                                        |                                            |                                          | <input type="checkbox"/> |           |                     |  |
| <b>unit Reference number</b>  | <b>01</b> | mg                    | <b>02</b> | g          | <b>03</b>                  | mcg                                    | <b>04</b>                                  | mL                                       | <b>05</b>                | L         |                     |  |
|                               | <b>06</b> | T(Tablet)             | <b>07</b> | C(Capsule) | <b>88</b>                  | NA(not applicable)                     | <b>97</b>                                  | etc                                      | <b>99</b>                | UK        |                     |  |
| <b>Route Reference number</b> | <b>01</b> | oral: PO              |           | <b>02</b>  | sublingual: SL             |                                        | <b>03</b>                                  | Intramuscular :IM                        |                          | <b>04</b> | intravenous: IV     |  |
|                               | <b>05</b> | subcutaneous: SC      |           | <b>06</b>  | Inhalation                 |                                        | <b>07</b>                                  | Skin application                         |                          | <b>08</b> | Mucosal application |  |
|                               | <b>09</b> | Rectal administration |           | <b>10</b>  | etc                        |                                        | <b>88</b>                                  | NA                                       |                          | <b>99</b> | UK                  |  |

Concomitant medication  Yes  No

Subject number:

Initial:

### Unscheduled visit

Date of visit:

Subject number:

Initial:

1. Reason for visit

- Adverse event
- If medical treatment is required after clinical examination
- etc (reason :

2. Bwt:  Yes     No , \_\_\_\_\_kg

3. Vital sign  Yes     No

BT: °C            PR: /min            RR: /min            S.B.P/D.B.P:    mmHg

4. ECOG Performance Status  0  1  2  3  4

5. Identified concomitant medication:

6. Identified adverse reactions:

7. Performed lab tests:



Details of Adverse events (Describe in detail of adverse events, clinical courses)

Action for Adverse Reactions (Describe in detail of treatment, results, and follow-up management)

★ Whether or not information about serious adverse events has been forwarded to the sponsor

Yes                      No                      N/A

★ Whether a research plan change is necessary?

Yes                      No

★ Whether any change in consent form is required?

Yes (Attached form of revised written consent form) No

Date: YYYY/MM/DD

Doctor:

Writer:

Comment:

**Follow-up visit (Day 60, Day 90, Day 120, Day 150, and Day 180)**

\* If the hospitalization is continued until the above point, repeat the following items every 1 week until the time of discharge, and follow the above point after discharge

Clinical assessment

1. Alcohol intake: follow-up AUDIT-K Yes No

Date of Laboratory test:

Complete blood count

| Item                                  | Result | If abnormal results                                      |
|---------------------------------------|--------|----------------------------------------------------------|
| WBC( $\times 10^3/\mu\text{L}$ )      |        | <input type="checkbox"/> CS <input type="checkbox"/> NCS |
| Neutrophil (%)                        |        | <input type="checkbox"/> CS <input type="checkbox"/> NCS |
| Lymphocyte (%)                        |        | <input type="checkbox"/> CS <input type="checkbox"/> NCS |
| Monocyte (%)                          |        | <input type="checkbox"/> CS <input type="checkbox"/> NCS |
| Hemoglobin(g/dL)                      |        | <input type="checkbox"/> CS <input type="checkbox"/> NCS |
| Platelet( $\times 10^3/\mu\text{L}$ ) |        | <input type="checkbox"/> CS <input type="checkbox"/> NCS |

Routine chemistry

| Item               | Result | If abnormal results                                      |
|--------------------|--------|----------------------------------------------------------|
| Inorganic P(mg/dl) |        | <input type="checkbox"/> CS <input type="checkbox"/> NCS |
| Glucose(mg/dl)     |        | <input type="checkbox"/> CS <input type="checkbox"/> NCS |
| BUN(mg/dl)         |        | <input type="checkbox"/> CS <input type="checkbox"/> NCS |
| Creatinine(mg/dl)  |        | <input type="checkbox"/> CS <input type="checkbox"/> NCS |
| GFR (mL/min)       |        | <input type="checkbox"/> CS <input type="checkbox"/> NCS |

|                        |  |                                                          |
|------------------------|--|----------------------------------------------------------|
| Uric acid(mg/dl)       |  | <input type="checkbox"/> CS <input type="checkbox"/> NCS |
| Cholesterol(mg/dl)     |  | <input type="checkbox"/> CS <input type="checkbox"/> NCS |
| Calcium(mg/dl)         |  | <input type="checkbox"/> CS <input type="checkbox"/> NCS |
| Total Protein(g/dl)    |  | <input type="checkbox"/> CS <input type="checkbox"/> NCS |
| Albumin(g/dl)          |  | <input type="checkbox"/> CS <input type="checkbox"/> NCS |
| Total bilirubin(mg/dl) |  | <input type="checkbox"/> CS <input type="checkbox"/> NCS |
| Alk.Phosphatase(IU/L)  |  | <input type="checkbox"/> CS <input type="checkbox"/> NCS |
| AST(SGOT)(IU/L)        |  | <input type="checkbox"/> CS <input type="checkbox"/> NCS |
| ALT(SGPT)(IU/L)        |  | <input type="checkbox"/> CS <input type="checkbox"/> NCS |
| GGT (IU/L)             |  | <input type="checkbox"/> CS <input type="checkbox"/> NCS |
| Na (mmol/L)            |  | <input type="checkbox"/> CS <input type="checkbox"/> NCS |
| K (mmol/L)             |  | <input type="checkbox"/> CS <input type="checkbox"/> NCS |

## Coagulation test

| Item     | Result | If abnormal results                                      |
|----------|--------|----------------------------------------------------------|
| PT(Sec)  |        | <input type="checkbox"/> CS <input type="checkbox"/> NCS |
| PT (%)   |        | <input type="checkbox"/> CS <input type="checkbox"/> NCS |
| PT (INR) |        | <input type="checkbox"/> CS <input type="checkbox"/> NCS |
